# Supplementary material for: Parkinson Disease Protein 7 (PARK7) Is Related to the Ability of Mammalian Sperm to Undergo In Vitro Capacitation
Source: MDPI journal article supplement (doi:10.3390/ijms221910804), 2021-10-06
Supplement: s1 [file s1]

### Supplementary material (Recuero et al.)

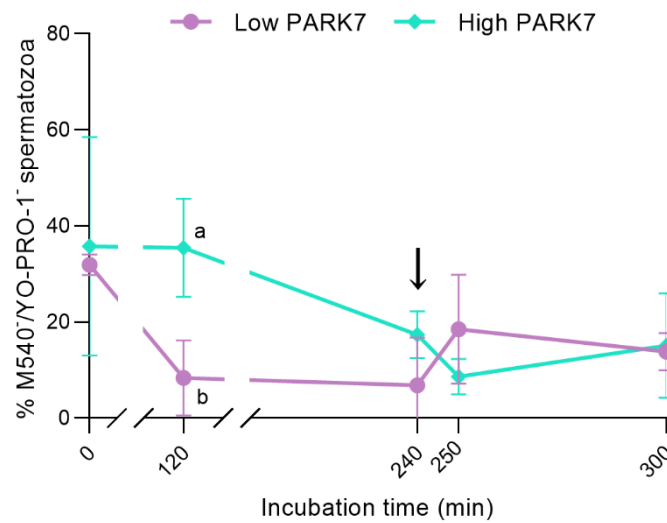

**Figure S1.** Percentage of viable spermatozoa with low lipid membrane disorder (M540<sup>+</sup>/YO-PRO-1<sup>-</sup>) during in vitro capacitation and progesterone-induced acrosome exocytosis (300 min). Black arrow indicates the time at which progesterone was added at a final concentration of 10  $\mu$ g/mL (240 min). Data are shown as mean  $\pm$  SD. Different letters indicate significant differences ( $p < 0.05$ ) between samples containing high or low levels of PARK7 at 0 min of incubation.

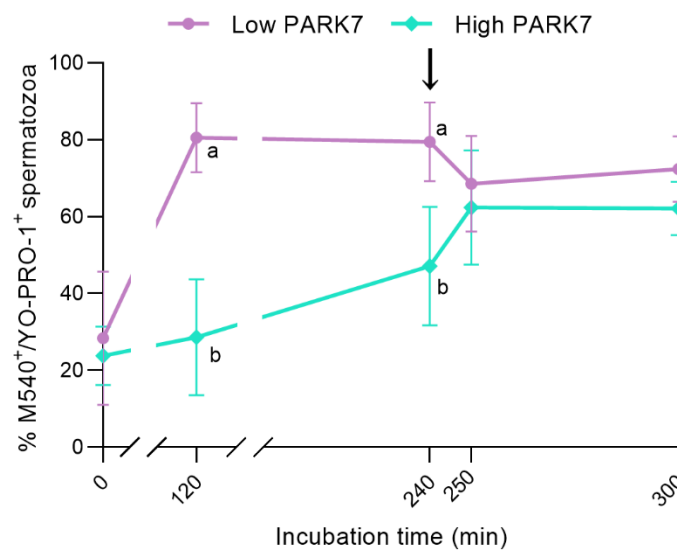

**Figure S2.** Percentage of non-viable spermatozoa with high lipid membrane disorder (M540<sup>+</sup>/YO-PRO-1<sup>+</sup>) during in vitro capacitation and progesterone-induced acrosome exocytosis (300 min). Black arrow indicates the time at which progesterone was added at a final concentration of 10  $\mu$ g/mL (240 min). Data are shown as mean  $\pm$  SD. Different letters indicate significant differences ( $p < 0.05$ ) between samples containing high or low levels of PARK7 at 0 min of incubation.

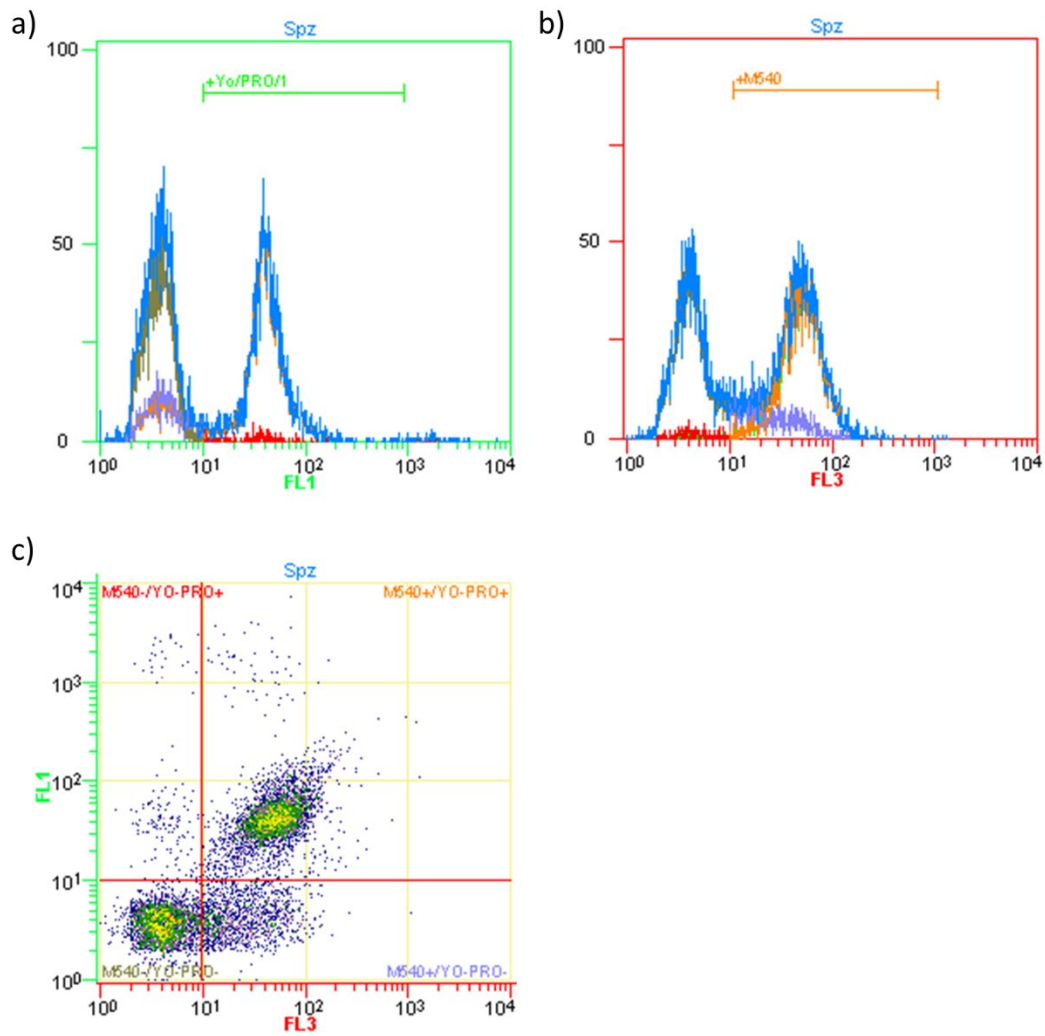

**Figure S3.** Representative flow cytometry YO-PRO (a) and M540 (b) histograms of sperm samples at the beginning of the in vitro capacitation experiment (0 min of incubation). (c) Dot plots of M540 and YO-PRO staining showing four distinct populations: M540-/YO-PRO<sup>+</sup>, M540+/YO-PRO<sup>+</sup>, M540-/YO-PRO<sup>-</sup>, and M540+/YO-PRO<sup>-</sup>.

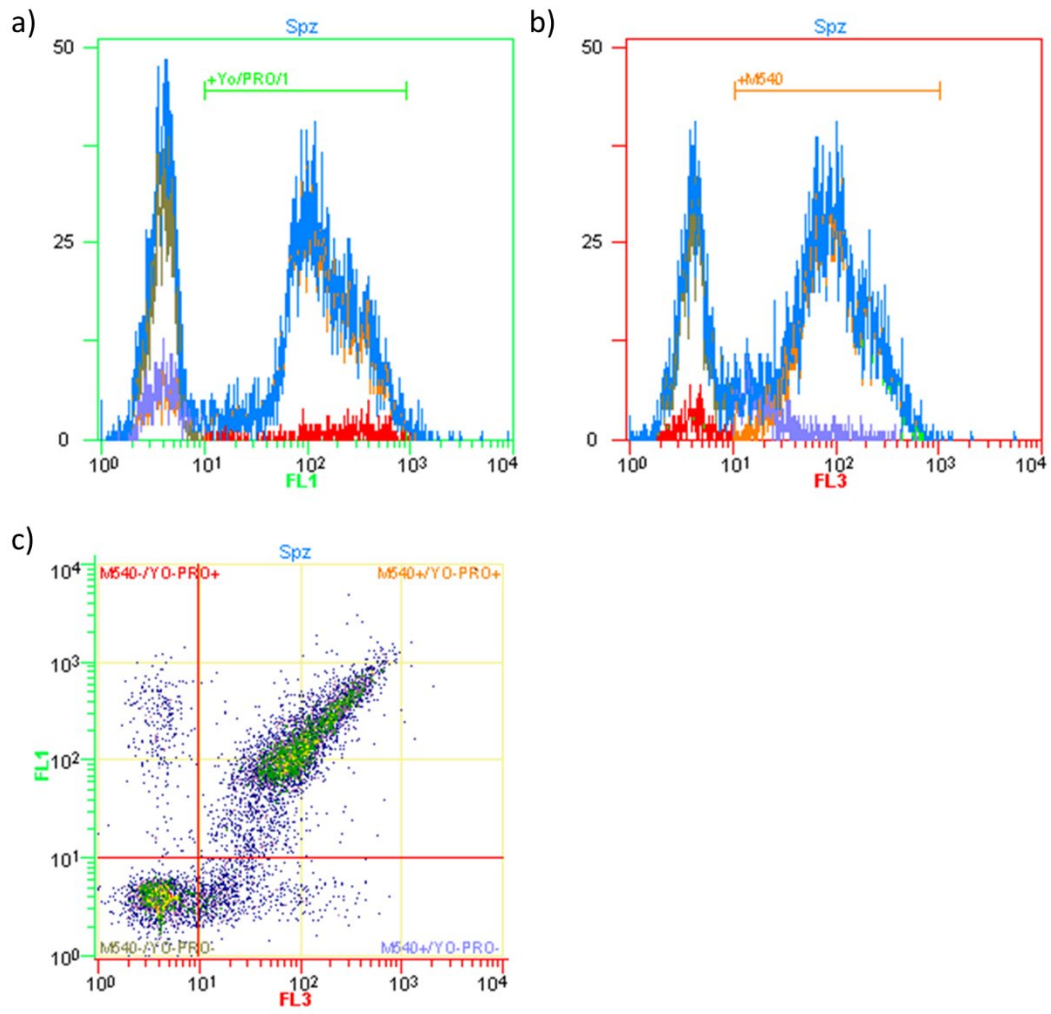

**Figure S4.** Representative flow cytometry YO-PRO (a) and M540 (b) histograms of sperm samples after 240 min of incubation in capacitation medium. (c) Dot plots of M540 and YO-PRO staining showing four distinct populations: M540-/YO-PRO<sup>+</sup>, M540+/YO-PRO<sup>-</sup>, M540-/YO-PRO<sup>-</sup>, and M540+/YO-PRO<sup>+</sup>.

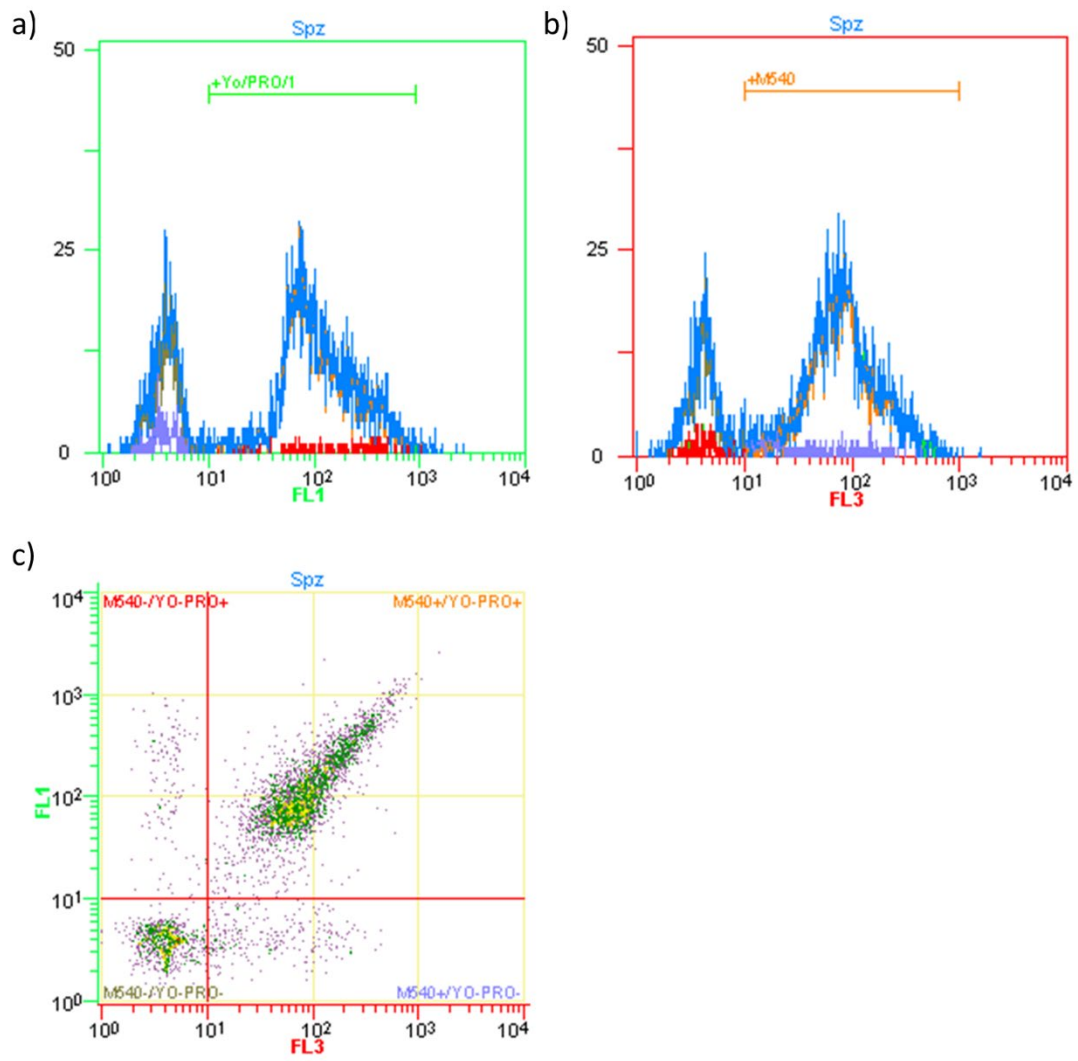

**Figure S5:** Representative flow cytometry YO-PRO (a) and M540 (b) histograms of sperm samples after 300 min of incubation in capacitation medium. (c) Dot plots of M540 and YO-PRO staining showing four distinct populations: M540-/YO-PRO<sup>+</sup>, M540+/YO-PRO<sup>-</sup>, M540-/YO-PRO<sup>-</sup>, and M540+/YO-PRO<sup>+</sup>.

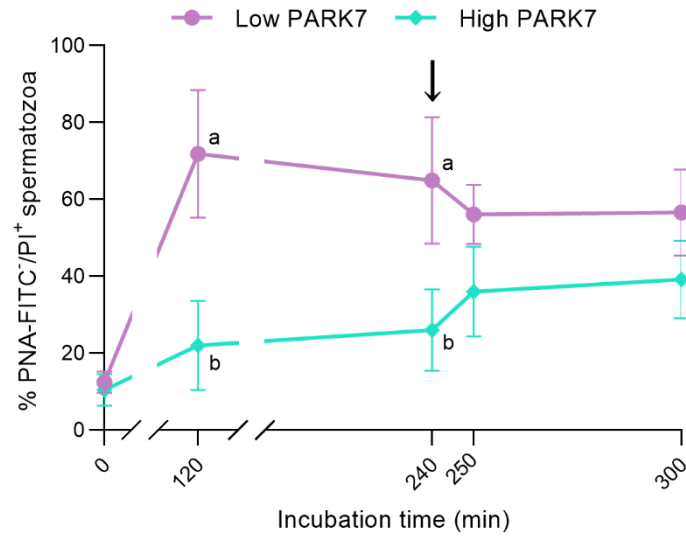

**Figure S6:** Percentage of non-viable spermatozoa with an acrosome that could not be fully intact (PNA-FITC<sup>+</sup>/PI<sup>+</sup>) during in vitro capacitation and progesterone-induced acrosome exocytosis (300 min). Black arrow indicates the time at which progesterone was added at a final concentration of 10  $\mu$ g/mL (240 min). Data are shown as mean  $\pm$  SD. Different letters indicate significant differences ( $p < 0.05$ ) between sperm samples with high or low PARK7 levels at 0 min of incubation.

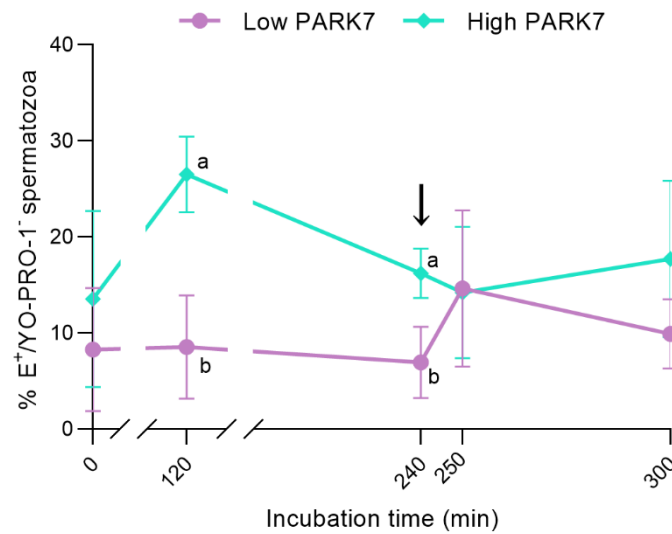

**Figure S7:** Percentage of viable sperm with high intracellular O<sub>2</sub><sup>-</sup> levels (E<sup>+</sup>/YO-PRO-1<sup>+</sup>) during in vitro capacitation and progesterone-induced acrosome exocytosis (300 min). Black arrow indicates the time at which progesterone was added at a final concentration of 10  $\mu$ g/mL (240 min). Data are shown as mean  $\pm$  SD. Different letters indicate significant differences ( $p < 0.05$ ) between sperm samples with high or low PARK7 levels at 0 min of incubation.
