# Supplementary material for: Parkinson Disease Protein 7 (PARK7) Is Related to the Ability of Mammalian Sperm to Undergo In Vitro Capacitation
Source: Int J Mol Sci. 2021 Oct 6;22(19):10804. doi: 10.3390/ijms221910804 (PMC8509420; doi:10.3390/ijms221910804)
Supplement: Supplementary file 1 [file ijms-22-10804-s001.zip › File S1_Recuero_et_al_2021_raw_data.xlsx]

## Sheet: MOTILITY
MALE	CODE	TIME (min)	static	non_progressive	progressive	total	fast	medium	slow	static	Progressive_fast_A	Non_Progressive_C	static_D	VCL	VSL	VAP	LIN	STR	WOB	ALH	BCF	head_area	spherical_cells	circular_movement
P1	44054	0	0.380553	0.0989187	0.520528	0.619447	0.553148	0.0280183	0.0382799	0.380553	0.553148	0.0662982	0.380553	110.389	76.7869	90.2861	69.5419	85.0448	81.7676	3.4116	9.73829	36.1675	0.19356	75.6667
P1	44054	120	0.731571	0.113196	0.155233	0.268429	0.164324	0.0371099	0.0669954	0.731571	0.164324	0.104105	0.731571	76.0396	45.9533	57.4568	60.1248	79.642	75.358	2.70237	8.79155	35.6013	0.476678	45.3333
P1	44054	240	0.765139	0.108096	0.126765	0.234861	0.138239	0.0244123	0.0722099	0.765139	0.138239	0.0966222	0.765139	69.7179	45.9841	54.4447	66.0387	84.4695	78.1874	2.35121	8.50507	38.5292	0.482664	36.6667
P1	44054	250	0.806081	0.112751	0.0811679	0.193919	0.0944482	0.0253857	0.0740854	0.806081	0.0944482	0.0994711	0.806081	64.2321	34.1	45.5622	53.2198	74.8066	71.0553	2.73239	7.61937	36.9179	0.753176	35
P1	44054	300	0.81474	0.104382	0.0808781	0.18526	0.10718	0.0176467	0.0604328	0.81474	0.10718	0.0780795	0.81474	72.7784	35.1541	48.9979	46.7933	69.5766	66.6568	2.79635	7.17379	39.8042	0.627049	45.3333
P2	44056	0	0.37352	0.075511	0.550969	0.62648	0.572482	0.0237616	0.0302365	0.37352	0.572482	0.0539981	0.37352	122.383	94.3162	107.637	77.0778	87.6444	87.9489	2.97697	10.1972	39.2609	0.191335	60
P2	44056	120	0.75899	0.0928682	0.148142	0.24101	0.161276	0.0264076	0.0533269	0.75899	0.161276	0.0797345	0.75899	69.8785	41.1453	50.0925	58.836	81.8895	71.6345	2.53975	9.1574	34.5591	0.484587	34.3333
P2	44056	240	0.692812	0.0995366	0.207651	0.307188	0.217682	0.0331488	0.0563569	0.692812	0.217682	0.0895057	0.692812	82.2803	55.4199	64.0746	67.2535	86.4079	77.8319	2.70818	9.35242	37.4375	0.440811	41.3333
P2	44056	250	0.910475	0.0548929	0.0346322	0.0895251	0.0430611	0.0084698	0.0379943	0.910475	0.0430611	0.0464641	0.910475	75.572	43.7722	54.6013	58.1905	80.0412	72.454	2.4827	8.15954	32.0566	0.400901	12.3333
P2	44056	300	0.929585	0.0422654	0.0281491	0.0704145	0.0398442	0.00327237	0.0272979	0.929585	0.0398442	0.0305703	0.929585	68.22	25.5285	37.8181	36.8463	66.3752	55.0009	2.22018	5.74632	37.2825	0.765339	15.6667
P3	44060	0	0.315877	0.0912317	0.592891	0.684123	0.633563	0.0239372	0.0266223	0.315877	0.633563	0.0505595	0.315877	136.08	98.7992	115.495	72.5696	85.5227	84.8487	3.7612	9.95725	35.0329	0.163747	85
P3	44060	120	0.634654	0.110221	0.255125	0.365346	0.283342	0.0243336	0.0576703	0.634654	0.283342	0.0820039	0.634654	84.0228	51.9035	62.6538	61.6754	82.7592	74.5045	3.06823	8.99479	36.4291	0.226762	56
P3	44060	240	0.759079	0.101192	0.139729	0.240921	0.147101	0.0277157	0.0661043	0.759079	0.147101	0.0938201	0.759079	77.1655	46.6772	56.8193	60.3635	82.0535	73.5638	2.58814	8.09688	36.5639	0.271111	35.3333
P3	44060	250	0.889507	0.0448357	0.0656572	0.110493	0.072947	0.0105827	0.0269631	0.889507	0.072947	0.0375459	0.889507	90.1301	54.4653	66.5339	60.5878	81.8772	74.007	2.94531	8.56307	35.1148	0.451063	18.3333
P3	44060	300	0.935189	0.0266919	0.0381188	0.0648107	0.0427694	0.00277245	0.0192688	0.935189	0.0427694	0.0220412	0.935189	62.1717	34.7965	43.0832	55.0515	80.1215	68.6771	2.09977	6.21423	34.0052	0.410014	8
P4	44061	0	0.36679	0.0683506	0.564859	0.63321	0.602845	0.0107725	0.0195924	0.36679	0.602845	0.0303649	0.36679	125.725	90.7518	103.779	72.2043	87.4689	82.5487	3.60695	10.3903	35.0735	0.169086	68
P4	44061	120	0.736038	0.0774634	0.186498	0.263962	0.222402	0.0111141	0.0304452	0.736038	0.222402	0.0415594	0.736038	95.7101	53.565	65.4734	55.9222	81.7941	68.3632	3.35451	8.7476	33.4643	0.412448	51.3333
P4	44061	240	0.770085	0.071244	0.158671	0.229915	0.176389	0.0186987	0.0348265	0.770085	0.176389	0.0535252	0.770085	87.7009	52.9973	64.098	60.5056	82.6963	73.166	2.83937	9.07824	36.4669	0.392459	34
P4	44061	250	0.888742	0.0526365	0.0586213	0.111258	0.0636278	0.00966715	0.0379629	0.888742	0.0636278	0.04763	0.888742	77.7588	44.2306	53.0221	56.7568	83.223	68.0488	2.8006	7.94946	37.4354	0.477901	17.6667
P4	44061	300	0.916992	0.0356841	0.0473237	0.0830079	0.054929	0.00515859	0.0229203	0.916992	0.054929	0.0280789	0.916992	73.1121	35.304	45.7862	47.8741	76.5401	62.3037	2.71133	8.30996	32.6712	0.419586	15
P5	44097	0	0.512758	0.103866	0.383376	0.487242	0.430468	0.0121118	0.0446616	0.512758	0.430468	0.0567734	0.512758	111.241	67.9397	82.7427	60.5652	81.6224	74.0169	3.92916	9.55252	32.2	0.187694	72.3333
P5	44097	120	0.884294	0.0678124	0.0478932	0.115706	0.061095	0.0112861	0.0433245	0.884294	0.061095	0.0546106	0.884294	61.3987	27.7482	40.2811	44.4679	67.7919	65.2418	2.12098	6.12669	31.4663	0.384576	22
P5	44097	240	0.899049	0.0618646	0.0390868	0.100951	0.0631826	0.00558447	0.0321844	0.899049	0.0631826	0.0377688	0.899049	62.3046	18.5196	31.3954	29.7829	59.0417	50.4348	2.03072	4.43089	31.2772	0.417458	24.3333
P5	44097	250	0.939396	0.0425724	0.0180312	0.0606035	0.034298	0.0026942	0.0236114	0.939396	0.034298	0.0263056	0.939396	60.5411	22.0691	33.1169	36.6652	64.2973	54.7876	2.25825	4.48756	33.1875	0.516604	15
P5	44097	300	0.943273	0.0389308	0.0177964	0.0567272	0.0361221	0.00540105	0.0152041	0.943273	0.0361221	0.0206051	0.943273	50.336	14.6054	24.3686	27.8082	56.6292	48.1494	1.5151	4.21646	31.6774	0.335207	16.3333
P6	44112	0	0.32577	0.0863543	0.587876	0.67423	0.636594	0.0122507	0.0253858	0.32577	0.636594	0.0376365	0.32577	136.935	99.2634	113.558	72.4777	87.4004	82.9214	3.78059	10.5391	28.8822	0.138638	63.3333
P6	44112	120	0.765224	0.0955544	0.139222	0.234776	0.170872	0.0178632	0.046041	0.765224	0.170872	0.0639042	0.765224	91.0229	54.5549	67.3677	59.6799	80.4728	73.8784	2.89648	9.32245	32.9211	0.284831	36.6667
P6	44112	240	0.844471	0.0663455	0.0891831	0.155529	0.0992503	0.0181886	0.0380896	0.844471	0.0992503	0.0562782	0.844471	70.708	39.2419	49.1403	55.0712	79.1824	69.2024	2.31973	7.73376	33.1699	0.339953	22.6667
P6	44112	250	0.901411	0.0554056	0.0431839	0.0985894	0.0632918	0.0068733	0.0284243	0.901411	0.0632918	0.0352976	0.901411	73.1885	37.0909	49.0892	50.553	75.1308	67.1791	2.55951	7.47647	31.3247	0.394131	21
P6	44112	300	0.914164	0.0383413	0.047495	0.0858364	0.0488749	0.0131969	0.0237645	0.914164	0.0488749	0.0369614	0.914164	59.8032	33.1888	41.7557	55.4822	79.488	69.783	2.3741	8.11052	31.5628	0.311475	15
P7	44145	0	0.466157	0.0801471	0.453696	0.533843	0.415516	0.058669	0.059658	0.466157	0.415516	0.118327	0.466157	66.0051	37.3451	42.8526	56.6015	87.0806	64.996	2.60777	11.089	31.1176	0.198115	89.6667
P7	44145	120	0.640839	0.0869946	0.272166	0.359161	0.258422	0.0384797	0.0622595	0.640839	0.258422	0.100739	0.640839	64.0974	29.0157	35.5778	45.3101	81.5716	55.526	2.7028	10.8807	30.0107	0.213583	92.6667
P7	44145	240	0.596087	0.0875343	0.316379	0.403913	0.299349	0.0408884	0.0636753	0.596087	0.299349	0.104564	0.596087	71.7465	43.3179	49.7232	60.2875	87.0631	69.231	2.62914	10.2633	30.5504	0.226123	68
P7	44145	250	0.683069	0.078334	0.238597	0.316931	0.243871	0.0193698	0.0536901	0.683069	0.243871	0.07306	0.683069	80.2938	51.1657	57.6123	63.6841	88.7552	71.7219	2.81339	10.5668	32.081	0.285424	42.6667
P7	44145	300	0.607173	0.0891049	0.303722	0.392827	0.301395	0.0359719	0.05546	0.607173	0.301395	0.091432	0.607173	73.6213	40.4582	47.5351	54.9166	85.1028	64.5285	2.81419	10.5776	31.7398	0.195784	71.6667
P8	44147	0	0.511349	0.0647927	0.423858	0.488651	0.375468	0.0706205	0.0425622	0.511349	0.375468	0.113183	0.511349	63.997	38.4817	44.2399	59.6281	86.5553	68.7379	2.49492	10.2836	35.0431	0.205319	69.3333
P8	44147	120	0.508732	0.0800715	0.411196	0.491268	0.381371	0.050989	0.0589074	0.508732	0.381371	0.109896	0.508732	72.1028	47.5245	53.9562	65.9907	88.0839	74.9038	2.564	10.0057	32.5463	0.181545	55
P8	44147	240	0.461363	0.0547728	0.483864	0.538637	0.35502	0.173567	0.0358687	0.300329	0.490235	0.053041	0.31292	76.9274	54.705	60.6104	71.1045	90.2624	78.7761	2.57314	10.3036	31.2303	0.202141	49.3333
P8	44147	250	0.648132	0.0581	0.293768	0.351868	0.298542	0.0185961	0.0347297	0.648132	0.298542	0.0533257	0.648132	96.1356	72.0807	79.5349	74.9628	90.6787	82.6724	2.85223	10.4271	31.4863	0.244164	27.3333
P8	44147	300	0.678495	0.0531627	0.268343	0.321505	0.272024	0.0164982	0.0329831	0.678495	0.272024	0.0494813	0.678495	86.3341	60.9289	67.9711	70.533	89.6016	78.7065	2.82212	10.1996	32.6412	0.348555	26

## Sheet: CYTOMETRY
MALE	CODE	Time	SY_PCT_DEAD	SY_PCT_MORIBUND	SY_PCT_LIVE	SY_EV_DEAD	SY_EV_MORIBUND	SY_EV_DEBRIS	SY_EV_LIVE	SY_DIAMETER_DEAD	SY_DIAMETER_MORIBUND	SY_DIAMETER_DEBRIS	SY_DIAMETER_LIVE	M5_PCT_LIVE_LIPIDDISORDER	M5_PCT_DEAD_LIPIDDISORDER	M5_PCT_LIVE_NON_LIPIDDISORDER	M5_PCT_DEAD_NON_LIPIDDISORDER	M5_M540_INT_LIVE_LIPIDDISORDER	M5_M540_INT_DEAD_LIPIDDISORDER	M5_M540_INT_LIVE_NON_LIPIDDISORDER	M5_M540_INT_DEAD_NON_LIPIDDISORDER	M5_YOPRO_INT_LIVE_LIPIDDISORDER	M5_YOPRO_INT_DEAD_LIPIDDISORDER	M5_YOPRO_INT_LIVE_NON_LIPIDDISORDER	M5_YOPRO_INT_DEAD_NON_LIPIDDISORDER	M5_DIAMETER_LIVE_LIPIDDISORDER	M5_DIAMETER_DEAD_LIPIDDISORDER	M5_DIAMETER_LIVE_NON_LIPIDDISORDER	M5_DIAMETER_DEAD_NON_LIPIDDISORDER	M5_EV_LIVE_LIPIDDISORDER	M5_EV_DEAD_LIPIDDISORDER	M5_EV_LIVE_NON_LIPIDDISORDER	M5_EV_DEAD_NON_LIPIDDISORDER	HE_PCT_Live_HighROS	HE_PCT_Dead_HighROS	HE_PCT_Live_LowROS	HE_PCT_Dead_LowROS	HE_HE_INT_Live_HighROS	HE_HE_INT_Dead_HighROS	HE_HE_INT_Live_LowROS	HE_HE_INT_Dead_LowROS	HE_YP_INT_Live_HighROS	HE_YP_INT_Dead_HighROS	HE_YP_INT_Live_LowROS	HE_YP_INT_Dead_LowROS	HE_DIAMETER_Live_HighROS	HE_DIAMETER_Dead_HighROS	HE_DIAMETER_Live_LowROS	HE_DIAMETER_Dead_LowROS
P1	44054	0	31.1274	10.9968	57.8758	150.133	194.521	133.714	130.399	9.08794	9.90665	8.74324	8.67	0.154547	0.483893	0.309837	0.0182599	24.2233	52.7289	4.31019	4.68103	4.06849	47.0623	3.69201	52.7519	6.67753	6.8659	6.28047	6.48861	142.965	155.395	120.664	131.755	0.0786561	0.535314	0.353586	0.032444	28.5629	23.7612	3.76576	4.44327	4.54617	23.8786	3.87809	22.6726	9.12094	9.27766	8.56883	8.91472
P1	44054	120	48.7873	22.5824	28.6303	193.174	329.832	142.626	135.589	9.8839	11.8139	8.93369	8.78425	0.0738619	0.715358	0.166905	0.0276464	25.47	88.4922	4.18357	4.39566	4.40327	93.7057	3.73406	111.625	7.36899	7.69188	6.63078	8.69861	183.209	202.004	133.656	281.678	0.14608	0.699669	0.121613	0.0326374	28.5834	47.9953	3.8143	3.90008	4.30455	28.562	3.87983	32.8943	9.0022	9.54907	7.90377	9.54043
P1	44054	240	46.5764	29.2287	24.1949	179.617	316.957	134.258	123.563	9.64281	11.6541	8.75062	8.51125	0.0697083	0.69751	0.18219	0.0319712	25.6829	90.9863	4.1311	4.4712	4.3015	115.333	3.75968	116.872	7.75012	8.29941	7.05136	9.06891	209.028	252.445	158.686	318.11	0.103141	0.702141	0.164983	0.0297344	27.622	47.0927	3.8163	4.58793	4.37921	39.1192	3.84708	29.2244	10.2383	10.9982	8.77793	10.1509
P1	44054	250	57.9311	22.501	19.568	156.846	261.219	131.122	107.423	9.21857	10.9288	8.68426	8.12618	0.0496169	0.748524	0.17077	0.02054	31.863	84.7788	4.03148	4.1525	4.12356	86.0937	3.73642	102.266	7.80224	8.24031	7.23354	8.87465	214.21	253.78	174.3	303.16	0.120661	0.726046	0.117863	0.0354296	25.7615	50.3235	4.38577	4.13156	4.20213	37.5673	3.90906	39.6142	9.44349	10.4351	8.66804	10.1373
P1	44054	300	58.7168	21.4171	19.8662	213.521	337.467	157.224	145.195	10.2202	11.9034	9.22622	8.98676	0.071595	0.734592	0.162132	0.0220683	26.9591	87.7771	3.89776	3.9018	3.88649	117.175	3.78856	155.259	7.40439	7.95399	6.94743	8.67594	186.381	226.952	152.305	285.315	0.140907	0.708557	0.113724	0.0368117	24.9396	53.7439	4.53595	4.29323	4.05772	36.56	3.91065	40.6923	9.408	10.5767	8.63616	10.3177
P2	44056	0	10.9219	10.0318	79.0463	136.292	222.899	124.857	129.581	8.79972	10.3671	8.54617	8.65301	0.529237	0.218943	0.213472	0.00790733	28.5625	65.6646	5.12613	5.22814	3.75629	39.3932	3.65485	39.9416	6.23792	6.68154	6.03911	6.31872	116.768	141.535	107.8	116.099	0.270279	0.231825	0.463171	0.034725	25.7913	31.3143	3.92861	4.18081	4.07535	21.0013	3.87443	36.3966	10.0972	9.966	8.81226	9.02468
P2	44056	120	58.1585	12.9703	28.8712	125.169	186.822	111.813	106.846	8.55373	9.77359	8.23791	8.11409	0.0462737	0.815453	0.103499	0.015624	30.0886	63.587	4.17258	4.51502	3.99235	71.4906	3.77662	75.5913	7.05581	7.14011	6.67486	7.3674	165.112	172.654	143.915	183.368	0.135439	0.663275	0.178564	0.0227221	26.4413	32.7139	3.72691	4.01249	5.81876	20.4332	3.85532	19.4346	10.5371	11.4327	10.2189	11.3329
P2	44056	240	30.0395	22.9357	47.0248	151.647	276.801	124.542	129.236	9.11788	11.1368	8.53903	8.64494	0.125671	0.647944	0.153961	0.0269952	23.56	72.8425	4.31798	4.47001	4.31777	62.4239	3.75427	66.0254	7.37867	7.37623	6.59546	8.1889	189.706	180.178	137.507	233.484	0.276753	0.499033	0.201061	0.0231527	35.8548	59.3417	3.80092	4.07493	4.5396	27.1402	3.89392	29.0473	10.2791	11.0048	8.88191	10.7548
P2	44056	250	53.3654	13.2996	33.335	192.719	294.898	160.012	154.293	9.87534	11.3752	9.2805	9.17055	0.0656438	0.675105	0.229828	0.0172234	27.4365	54.9079	3.77961	3.74924	3.91055	57.7249	3.86548	57.3163	7.06792	7.44152	6.75011	7.60574	167.659	192.633	149.564	202.123	0.152359	0.645202	0.170787	0.0316518	20.9002	44.2794	4.57584	4.49801	3.86969	33.7116	3.86729	33.9914	9.14378	9.78223	8.53685	9.42691
P2	44056	300	46.3731	20.1891	33.4378	164.85	299.166	139.363	135.676	9.36381	11.4261	8.85872	8.78057	0.0872316	0.666591	0.211261	0.0235756	39.8632	87.2858	4.17346	4.28457	4.12845	105.842	3.71919	102.613	7.49391	7.85353	7.09813	8.06285	197.026	226.363	173.537	240.957	0.197486	0.685418	0.0909868	0.0261087	20.8343	38.1023	5.02578	5.17465	3.92785	32.3778	3.89051	29.0296	9.69431	10.6106	9.25386	9.9096
P3	44060	0	14.7401	12.3042	72.9557	129.158	164.241	116.491	107.695	8.642	9.36184	8.35107	8.13412	0.222702	0.281921	0.446736	0.0116663	22.6455	60.5698	4.47683	4.38844	3.89985	28.5216	3.67404	32.2801	7.33903	7.70302	7.05169	7.37985	188.908	218.198	170.72	191.127	0.152337	0.250023	0.57196	0.0256801	28.0596	29.4478	3.8001	4.01792	4.58599	20.1162	3.88357	22.4115	9.43689	9.25631	8.24413	8.72745
P3	44060	120	46.1944	25.0083	28.7972	182.284	320.629	157.771	155.856	9.69495	11.7033	9.23908	9.20196	0.11975	0.822786	-1.46387e-05	0.0470895	25.9647	91.1313	4.7711	4.0973	4.2392	74.9757	3.83279	97.3543	7.39278	7.71062	7.06391	9.1456	188.661	208.145	157.458	340.997	0.224266	0.652686	0.106235	0.016813	30.2107	41.8768	3.99924	4.27954	4.58484	24.2994	3.88918	22.3467	10.9133	10.7649	9.24646	10.3486
P3	44060	240	40.9578	39.7388	19.3034	161.176	349.849	138.319	140.555	9.30043	12.0481	8.83267	8.88754	0.146578	0.659786	0.147567	0.0298217	22.3686	66.9411	4.34903	4.66338	4.42595	58.8798	3.79875	57.6984	7.92982	7.93163	6.92086	8.69345	233.694	221.319	153.911	275.918	0.199936	0.608617	0.166652	0.0247949	32.2154	53.3362	4.10513	4.51592	4.40693	38.4923	3.89197	34.955	10.7925	11.1623	8.96625	11.0508
P3	44060	250	55.2639	26.0918	18.6443	175.161	263.017	165.313	129.362	9.55838	10.9546	9.37901	8.64214	0.0920758	0.71495	0.165061	0.0195904	27.0088	95.0395	4.50383	5.23202	4.18788	84.7831	3.77669	99.8118	7.03067	7.25314	6.28868	8.30148	156.59	166.404	114.568	222.895	0.102722	0.675905	0.186349	0.0350238	25.5637	51.8918	3.82021	3.8922	4.59743	33.3105	3.77967	32.6598	10.0997	10.9967	9.1924	10.7737
P3	44060	300	54.8678	28.487	16.6452	158.373	233.855	155.712	116.36	9.25005	10.5351	9.19232	8.34433	0.102524	0.688219	0.174717	0.0286292	32.1098	104.312	4.37189	4.78357	4.23724	99.524	3.75078	123.606	7.47531	7.90231	7.19559	8.8134	192.141	218.324	166.288	291.166	0.110435	0.713279	0.149781	0.0265051	27.2938	61.0028	4.12188	4.10998	4.29597	36.5277	3.80217	48.7771	9.06687	9.87799	8.28733	10.3848
P4	44061	0	19.5292	37.9182	42.5526	124.84	234.723	117.693	107.671	8.54507	10.5463	8.37904	8.13383	0.333404	0.320045	0.295616	0.018554	31.3527	72.5528	4.54893	4.79027	4.13347	34.1957	3.78282	30.7709	6.29081	6.93428	5.90914	6.76179	118.884	151.444	100.721	131.04	0.241363	0.378842	0.346155	0.0336397	23.0966	32.5069	3.97262	5.1804	4.48386	24.8271	3.81172	26.0199	10.5096	10.9366	8.78666	9.2569
P4	44061	120	34.066	36.64	29.294	133.75	264.712	118.794	116.099	8.74061	10.9761	8.3986	8.33363	0.186493	0.458581	0.289847	0.0252469	21.1938	47.6333	4.32649	5.04218	4.49144	41.7428	3.88292	31.8899	7.26721	7.33305	6.42756	7.27558	177.622	174.345	127.229	164.455	0.264885	0.49937	0.208193	0.0275525	31.1746	36.8479	4.03866	4.72682	4.43003	25.6852	3.87039	22.29	10.4548	10.3895	8.86443	9.72264
P4	44061	240	36.8216	41.4405	21.7379	150.574	288.219	123.374	122.741	9.09651	11.295	8.51166	8.49707	0.181746	0.601461	0.173839	0.0265869	23.4931	71.9492	4.55503	4.84958	4.57626	54.7384	3.84571	48.3888	7.18264	7.59604	6.55284	8.83221	170.95	187.439	125.744	279.096	0.166042	0.553075	0.244657	0.0362267	30.5865	46.0643	3.94842	4.91023	4.71486	33.6746	3.88081	22.3083	10.5727	11.2993	9.16439	10.2229
P4	44061	250	65.2187	18.2159	16.5654	174.017	242.979	152.308	133.127	9.47479	10.6279	9.0956	8.65823	0.0563884	0.792991	0.120017	0.0241203	34.6939	71.8641	4.22268	4.57165	4.42669	64.6957	3.85101	71.1583	7.07108	7.36073	6.77527	8.04912	159.656	181.805	142.723	222.598	0.0649304	0.796325	0.111096	0.0276492	29.076	31.9527	3.82619	4.73896	4.80173	32.7838	3.96944	22.9591	8.92801	9.84122	8.76813	9.18327
P4	44061	300	54.8396	21.9026	23.2578	201.672	284.078	146.52	147.478	10.0275	11.2399	9.00957	9.03425	0.118445	0.683508	0.166237	0.024155	32.2167	93.9601	4.4309	4.39235	4.23006	86.3699	3.79989	102.681	7.02723	7.30454	6.49265	8.01392	161.02	175.65	127.652	215.201	0.101901	0.689744	0.171366	0.0369891	26.1783	36.1811	3.73912	4.36247	4.41295	29.2712	3.92576	24.3805	10.4687	10.8166	9.29255	9.83837
P5	44097	0	20.6716	36.5649	42.7635	160.118	252.646	153.231	142.25	9.27493	10.7971	9.14652	8.90708	0.479966	0.184595	0.304129	0.00899769	17.9699	33.3105	3.70726	3.73071	3.84095	19.465	3.85167	17.4213	6.55118	6.96706	6.19171	6.56108	121.191	143.291	103.867	119.583	0.0208841	0.295839	0.473772	0.209505	22.1558	21.7678	2.52929	2.62667	2.85916	18.387	2.63648	9.97942	6.27205	6.88999	5.96201	6.10971
P5	44097	120	57.9396	38.902	3.15843	165.178	218.647	167.166	225.065	9.38126	10.2966	9.39666	10.3414	0.10543	0.803824	0.0717388	0.0135756	16.1995	65.8837	3.88613	4.43841	4.03516	80.4899	3.70671	34.8146	6.76183	7.20922	6.24596	8.24931	138.57	161.536	110.107	219.059	0.0671451	0.743925	0.167622	0.0213077	39.9653	60.3901	3.82594	3.9709	5.23885	34.6474	3.83408	40.6873	8.91313	10.1599	8.73886	10.6259
P5	44097	240	47.989	30.7854	21.2256	196.122	319.763	162.557	155.052	9.93239	11.6855	9.32922	9.18548	0.167373	0.782935	0.0236601	0.012955	21.0516	95.5029	4.12982	4.34168	4.31008	125.155	3.69538	111.079	6.89257	7.32141	6.45261	8.2718	150.921	172.865	118.954	232.951	0.0752975	0.473881	0.433333	0.0174879	22.8055	24.8914	2.53827	3.22714	3.41698	19.9515	2.56656	15.4983	6.81478	7.51974	6.46582	7.27512
P5	44097	250	40.0685	23.3712	36.5603	174.633	291.248	143.187	137.315	9.55046	11.3211	8.93469	8.81514	0.0723391	0.541233	0.30475	0.053432	75.6581	100.016	5.8087	9.60483	5.76277	137.377	3.97339	98.3554	7.28331	7.89858	6.66648	8.74689	170.208	207.603	135.117	265.66	0.08122	0.654691	0.234162	0.0299263	31.3092	39.5081	3.85975	5.03934	4.38	40.4736	3.8675	23.6972	10.2493	11.0754	9.43172	10.0789
P5	44097	300	36.9866	29.6311	33.3823	169.123	349.444	152.776	126.069	9.45589	12.0412	9.12745	8.5725	0.140508	0.633243	0.159227	0.0504201	40.4394	88.454	4.33752	4.68553	4.36906	98.3096	3.78676	95.3297	7.16595	8.17333	7.08682	8.92729	165.388	230.769	153.336	303.821	0.0779779	0.660257	0.236778	0.0249872	39.8172	51.4566	3.82441	4.68265	4.36824	43.0993	3.8531	27.2037	10.092	11.6295	9.51138	10.6149
P6	44112	0	15.8085	16.3882	67.8033	157.436	297.721	147.308	144.362	9.23326	11.417	9.03023	8.97009	0.420579	0.182402	0.343881	0.0100769	17.8838	39.902	3.80778	4.07667	3.67457	35.0795	3.8029	28.3303	6.95073	7.47679	6.62664	6.96207	161.999	198.111	141.509	160.489	0.148904	0.25371	0.566888	0.0304983	20.1996	33.9975	3.92357	4.17267	3.94764	21.5288	3.79848	18.6555	10.9622	10.7413	9.47305	10.0084
P6	44112	120	84.3948	5.14614	10.4591	189.711	294.264	147.827	117.264	9.82497	11.3714	9.0411	8.36872	0.0624684	0.895871	0.0121329	0.0210457	37.649	84.2897	3.86589	3.94552	3.87071	99.5269	3.83082	119.16	7.50558	8.16351	7.52059	8.91238	188.058	255.087	188.059	316.348	0.0432055	0.902296	0.0436979	0.0108004	32.9925	37.6752	3.71192	3.73839	4.88567	23.0075	3.84338	28.0537	8.73972	9.66737	8.09926	10.082
P6	44112	240	80.1831	6.94248	12.8744	153.63	354.694	116.909	86.5423	9.15822	12.0992	8.35943	7.55971	0.0861949	0.902414	-0.0091403	0.0161581	50.199	105.45	4.03585	4.87674	4.1745	98.6494	3.77549	48.2306	6.51184	7.17149	6.55711	8.48103	114.001	164.197	116.964	243.689	0.0297228	0.911612	0.0502634	0.0084018	35.1921	40.5194	3.71123	3.76978	5.5413	28.0456	3.85429	30.5036	9.93145	10.8644	9.14691	10.4817
P6	44112	250	54.6698	21.0578	24.2724	171.117	282.408	129.12	127.003	9.49179	11.2185	8.64153	8.5939	0.130173	0.765332	0.0788179	0.0163769	20.9614	112.034	4.03389	4.11744	4.20098	109.539	3.7119	99.1805	6.80024	7.37817	6.39787	8.26832	146.651	180.585	117.988	240.455	0.237635	0.721918	0.0242059	0.0162408	21.335	52.663	4.43243	3.96662	3.73205	32.8877	3.86747	33.6789	10.2553	11.1747	9.19467	11.0706
P6	44112	300	59.9498	18.3965	21.6537	185.115	294.223	147.133	135.639	9.74399	11.3725	9.02621	8.78335	0.0778449	0.803177	0.0940274	0.0164597	20.4527	81.679	3.84431	3.8926	3.9511	92.6811	3.81174	114.353	7.29353	7.61303	6.69348	8.27547	180.911	203.15	139.686	244.4	0.0787463	0.777763	0.115665	0.0278262	28.3585	48.9649	3.8392	4.16121	4.20993	42.0945	3.86338	43.8083	10.0787	10.4898	8.94249	10.1442
P7	44145	0	8.53643	10.3895	81.0741	119.356	163.773	111.24	119.694	8.40541	9.35159	8.2211	8.4176	0.169073	0.169884	0.60969	0.00806348	14.3333	52.1478	3.76555	3.66891	3.88027	23.2165	3.83456	24.1845	7.22365	7.10117	6.63831	6.92134	178.039	169.962	142.272	158.193	0.0799713	0.172565	0.72454	0.0229236	15.3001	19.7828	3.74646	4.40214	3.98615	21.6628	3.81366	18.5526	10.4251	9.99064	9.35065	9.73436
P7	44145	120	12.9197	7.70348	79.3768	158.415	229.431	142.732	166.971	9.2523	10.468	8.93482	9.41601	0.308098	0.174508	0.472058	0.00659925	12.5013	65.3176	3.74336	3.62812	3.86748	29.3346	3.78703	29.1854	7.18448	7.1211	6.52882	6.69594	177.593	171.506	135.954	146.259	0.226086	0.218829	0.539654	0.0154313	15.3458	23.1343	3.71321	4.08522	3.86093	19.4712	3.82584	17.8847	10.9135	10.0398	9.22725	9.59442
P7	44145	240	28.817	14.5801	56.6029	172.09	245.965	139.154	167.965	9.51131	10.7121	8.86109	9.43473	0.44827	0.299952	0.221899	0.00737943	15.8764	87.7345	3.861	3.68452	4.19992	31.8893	3.77172	33.3565	7.17711	7.27854	6.39993	7.20083	175.803	180.173	126.603	168.408	0.13466	0.45169	0.389469	0.0241799	17.2655	29.4418	3.80925	4.21583	3.9813	31.7135	3.8055	27.2032	10.7215	10.2663	9.38138	9.93644
P7	44145	250	32.5658	18.8948	48.5394	135.655	202.323	114.078	132.463	8.78599	10.0379	8.29116	8.71674	0.3602	0.517007	0.0917564	0.0165738	16.6871	100.835	3.98541	3.78726	3.95055	39.245	3.75388	37.9839	7.06498	7.53372	6.32678	8.21997	169.289	196.297	121.621	245.434	0.19557	0.566994	0.200017	0.0374193	18.5135	28.0047	3.86593	4.45463	4.037	28.8497	3.81914	17.1474	10.5187	10.5126	8.96187	9.17372
P7	44145	300	48.5807	17.4391	33.9802	185.051	276.49	137.546	161.401	9.74393	11.1395	8.82634	9.30986	0.172974	0.546519	0.251089	0.0135528	16.2981	63.6967	3.78043	3.67649	3.95036	77.5755	3.82347	69.1955	7.61644	7.47933	6.70371	7.42169	205.154	193.405	145.042	187.212	0.16617	0.675243	0.131535	0.0270522	23.1474	37.856	4.50863	4.55034	3.91435	34.7451	3.88375	32.3164	8.83199	9.08536	7.87448	8.26974
P8	44147	0	10.9085	11.8985	77.193	135.591	164.851	120.003	126.983	8.78398	9.37094	8.43378	8.59179	0.585526	0.223151	0.168136	0.00958166	15.3498	93.7489	3.99522	3.94189	3.76016	42.2838	3.82726	43.2835	7.25855	7.55399	6.56446	7.2412	185.09	203.959	137.93	175.202	0.0852358	0.195874	0.684156	0.0347346	20.5686	26.1822	3.79188	4.22055	4.25063	29.6755	3.87995	25.6348	10.2787	10.1795	9.40759	9.66849
P8	44147	120	17.7863	11.3824	70.8314	176.305	264.847	145.294	182.983	9.58748	10.9811	8.98911	9.70741	0.440389	0.226222	0.301717	0.00859309	12.9044	94.9643	3.67545	3.59805	3.85948	51.9672	3.83492	48.6577	7.28764	7.35223	6.64072	7.17619	185.462	188.05	142.854	174.077	0.304654	0.315223	0.35567	0.0244535	20.5866	39.1204	4.19637	4.29329	3.7521	40.9277	3.84031	36.25	9.54827	9.30779	8.3061	8.58815
P8	44147	240	29.2259	33.1049	37.6692	146.096	284.95	131.929	133.586	9.00487	11.2485	8.70199	8.74007	0.317349	0.511135	0.125059	0.0408532	19.0951	98.1269	3.82864	3.71603	4.06561	56.1071	3.83986	52.763	8.92686	9.19924	8.26193	9.67633	328.979	368.454	258.597	430.059	0.185693	0.521629	0.248034	0.0446435	26.2429	46.4968	4.00003	4.25543	4.16393	31.4306	3.89626	25.5126	9.55766	10.0823	7.91041	8.92214
P8	44147	250	40.25	21.1138	38.6362	154.171	250.389	120.737	143.661	9.16768	10.7773	8.45011	8.95442	0.370548	0.560178	0.0469082	0.0144349	22.3921	134.738	3.87614	3.80078	3.88774	58.1982	3.84349	63.8648	6.81457	7.07682	6.10128	7.93211	149.637	162.244	108.292	211.295	0.166253	0.635062	0.150513	0.048172	21.3734	31.9048	4.05043	4.30376	3.96806	29.162	3.85704	21.8229	10.6767	10.5935	9.24847	9.10915
P8	44147	300	41.7016	20.6543	37.6441	173.821	267.16	129.23	155.704	9.54092	11.0125	8.64243	9.1978	0.311681	0.633443	0.0353357	0.0138536	22.802	153.807	3.85351	3.8878	3.80308	58.3134	3.84688	66.423	7.17321	7.46491	6.49128	8.38613	175.213	192.222	129.637	257.314	0.263834	0.58341	0.128867	0.0238892	26.414	35.1714	4.53399	4.87997	3.80902	31.182	3.86162	27.9231	8.07381	8.27208	6.97818	7.36547
[truncated: 76 more columns]
